# Supplementary material for: Trajectories of adolescent perceived stress and symptoms of depression and anxiety during the COVID-19 pandemic
Source: PubMed Central journal article supplement (PMC9509354; doi:10.1038/s41598-022-20344-y), 2022-09-24

**Supplementary Figure 1**

Observed individual values and estimated mean (in red) during the COVID-19 pandemic for stress

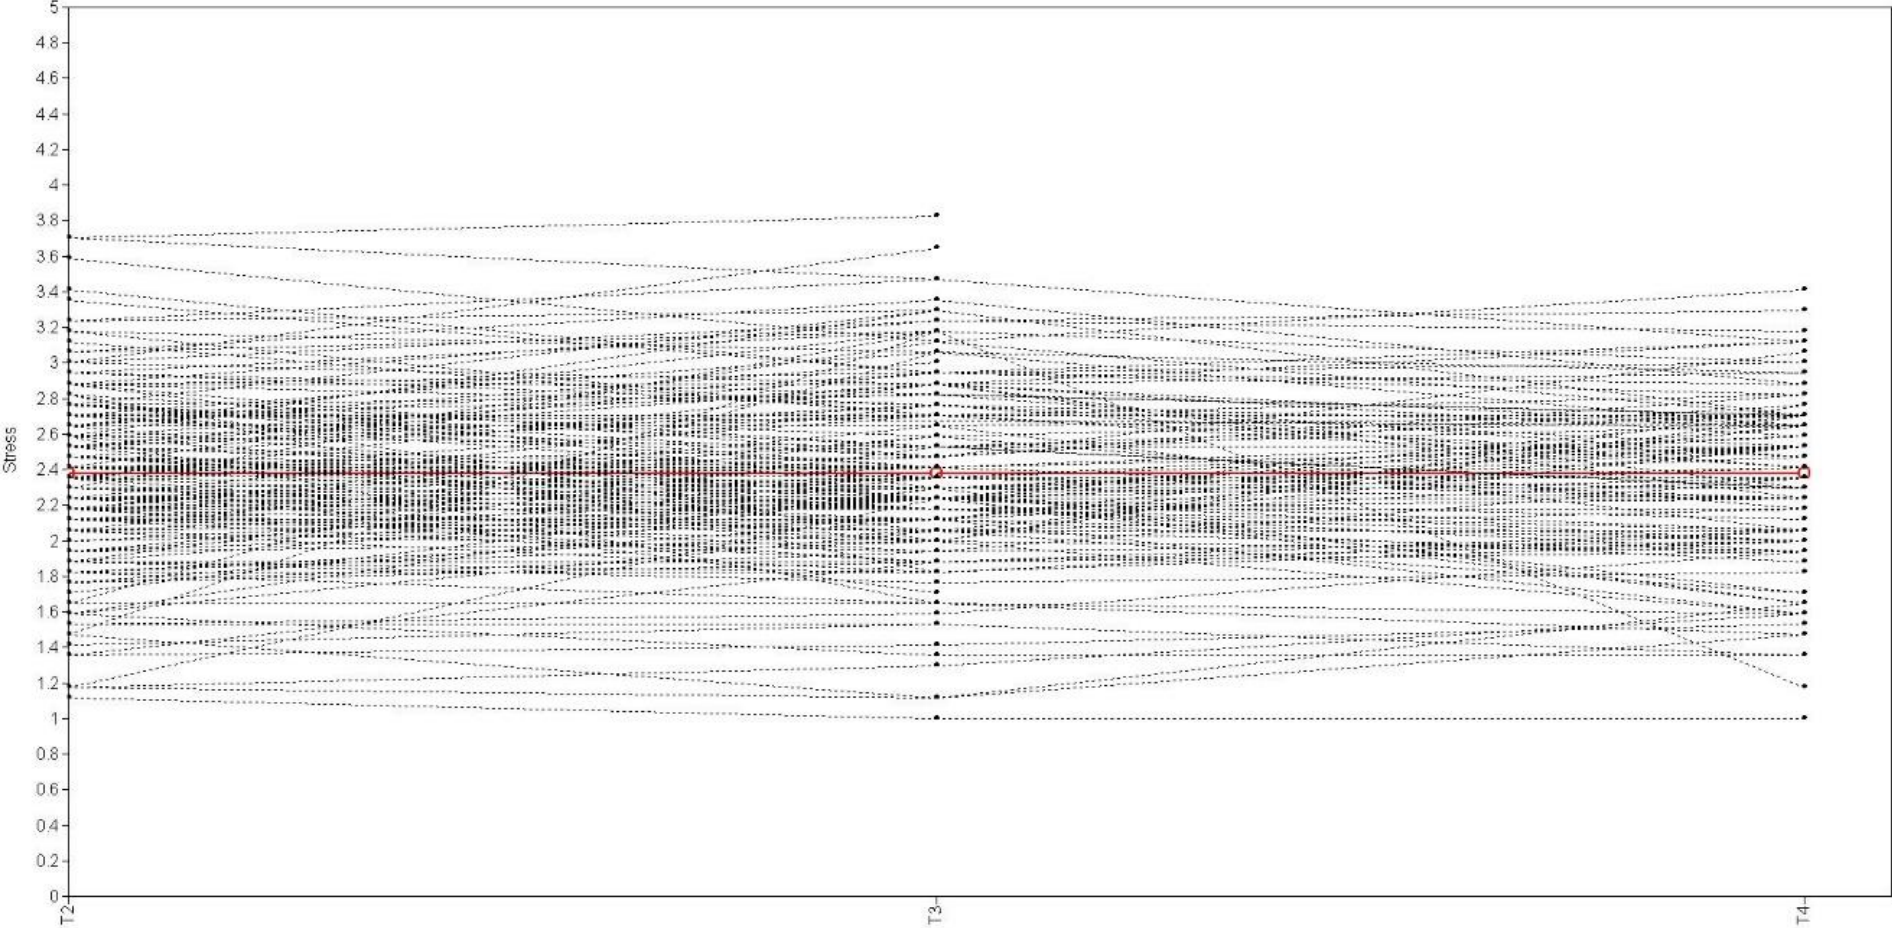

Supplement: 41598_2022_20344_MOESM1_ESM.pdf [file 41598_2022_20344_MOESM1_ESM.pdf]
